# Supplementary material for: Interface modification by defect engineering for g-C3N4/LaPO4−x nanorods towards efficient CO2 photoreduction
Source: Royal Society of Chemistry journal article supplement (doi:10.1039/d2nj03626f), 2022-01-01
Supplement: d2nj03626f1.pdf [file d2nj03626f1.pdf]

Supplementary information for

Interface Modification by Defects Engineering for g-  
C<sub>3</sub>N<sub>4</sub>/LaPO<sub>4-x</sub> Core-shell Nanorods towards Efficient CO<sub>2</sub>  
Photoreduction

Sai Yan <sup>a</sup>, Lei Chen <sup>a</sup>, Fangyu Peng <sup>a</sup>, Yuanyuan Fan <sup>a</sup>, Yanlong Yu <sup>a,\*</sup>, Yue Liu <sup>b,\*</sup>,  
and Yaan Cao <sup>c</sup>

<sup>a</sup> Faculty of Mathematics and Physics, Huaiyin Institute of Technology, Huaian, 223003, People's Republic of China.

<sup>b</sup> College of Material Science Engineer, Liaoning Technical University, Fuxin, 123000, People's Republic of China

<sup>c</sup> Key Laboratory of Weak-light Nonlinear Photonics, Ministry of Education, TEDA Applied Physics Institute and School of Physics, Nankai University, Tianjin, 300457, People's Republic of China

**Characterization**

X-ray diffraction (XRD) patterns were collected on a Rigaku D/max 2500 X-ray diffraction spectrometer (Cu K $\alpha$ ,  $\lambda=1.54056 \text{ \AA}$ ). High-resolution transmission electron microscopy (HRTEM) images were obtained by a JEOL 3010, for which the samples were prepared by applying a drop of ethanol suspension onto an amorphous carbon-coated copper grid and dried naturally. X-ray photoelectron spectroscopy (XPS) was carried out with a Thermo ESCALAB 250XI spectrometer using an unmonochromated Al K $\alpha$  (1486.6 eV) X-ray source. The electron spin resonance (ESR) spectra were measured on a Bruker a300 spectrometer at room temperature in air. Diffuse reflectance UV-visible absorption spectra were collected on a UV-visible spectrometer (UV-

1061PC, Shimadzu). Photocurrent measurements were performed on a CS 300 electrochemical workstation (CorrTest, Wuhan, China) in a conventional three electrode configuration with a Pt foil as the counter electrode and a Ag/AgCl (saturated KCl) reference electrode. A 500 W Xe arc lamp served as a light source. A 1 M Na<sub>2</sub>SO<sub>4</sub> aqueous solution was used as the electrolyte. The working electrodes were prepared as follows: 10 mg of the prepared photocatalyst was added into 1 mL of ethanol to make slurry under ultrasonic treatment. The slurry was then spread on a 2 × 1 cm<sup>2</sup> FTO glass substrate with an active area of about 1 cm<sup>2</sup> by the doctor-blade method, using adhesive tape as the space. The films were dried in air and annealed at 400 °C for 60 min in air. The photo-responses of the samples as light on and off were measured at 0.0 V. The electronic spin resonance (ESR) technique was measured on an electron paramagnetic resonance spectrometer (EMXplus-6/1, Bruker).

### **Theory Calculation**

A model of 72 atoms for (1 0 0) plane of LaPO<sub>4</sub> was constructed. The density functional theory (DFT) calculation was performed by using first-principle calculation software package CASTEP. Generalized gradient approximation (GGA)-based density functional theory (DFT) was used to calculate electronic band structure band structure and density of states (DOS) for LaPO<sub>4</sub> slab. The plane wave cutoff was set to be 300 eV and the k-point set was 1 × 3 × 1. The valence electronic configurations for La, O and P were 5s<sup>2</sup>5p<sup>6</sup>5d<sup>1</sup>6s<sup>2</sup>, 2s<sup>2</sup>2p<sup>4</sup> and 3s<sup>2</sup>3p<sup>3</sup>, respectively.

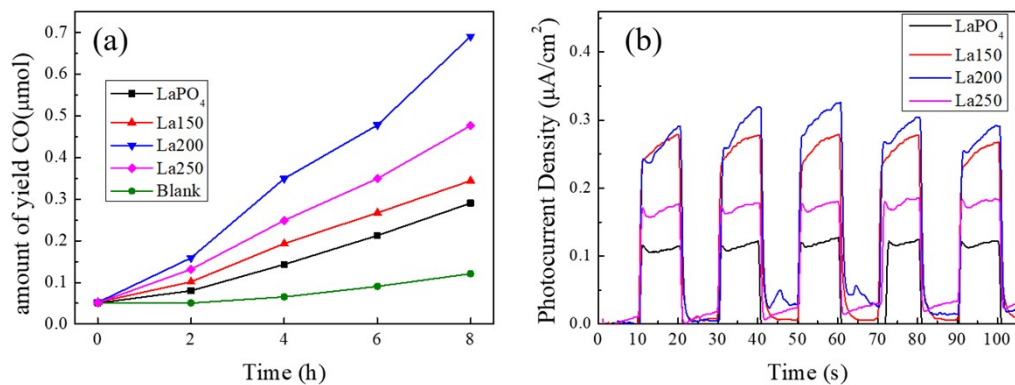

**Figure S1.** (a) Photocatalytic results on photo-reduction of CO<sub>2</sub> into CO and (b) photocurrent response spectra of LaPO<sub>4</sub> and LaPO<sub>4-x</sub> (La150, La200 and La250) nanorods.

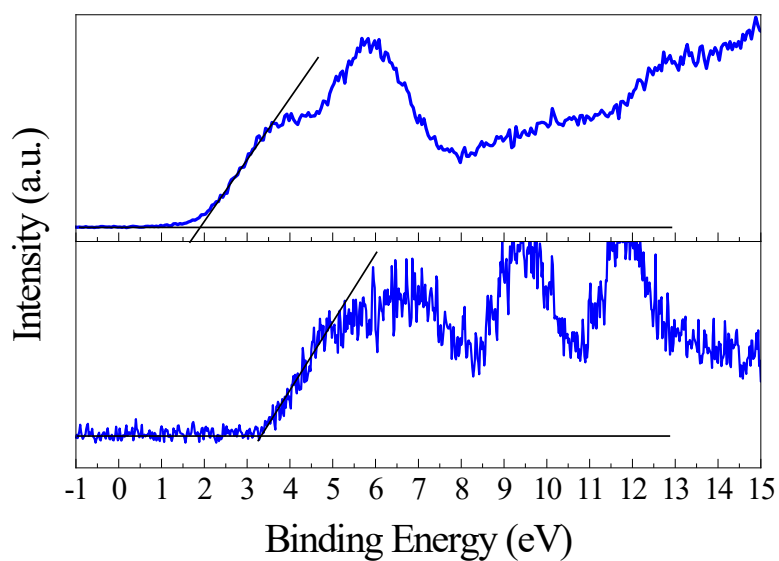

**Figure S2.** XPS valence band of g-C<sub>3</sub>N<sub>4</sub> and La200.

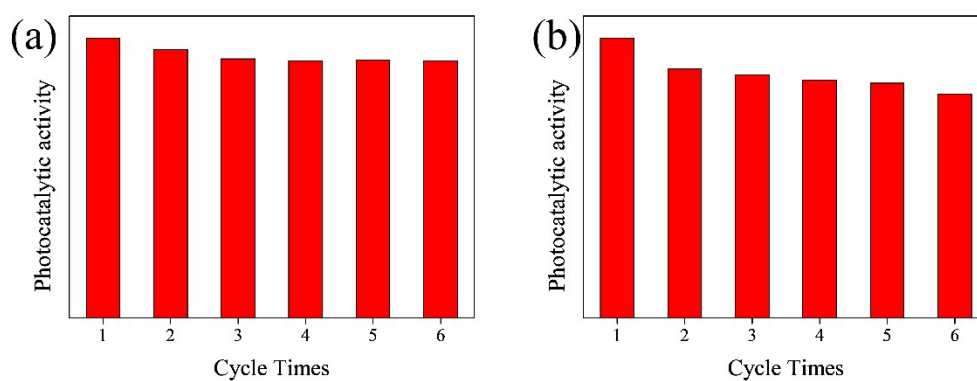

**Figure S3.** Photocatalytic stability of (a) g-C<sub>3</sub>N<sub>4</sub>/La<sub>200</sub> and (b) La<sub>200</sub>.

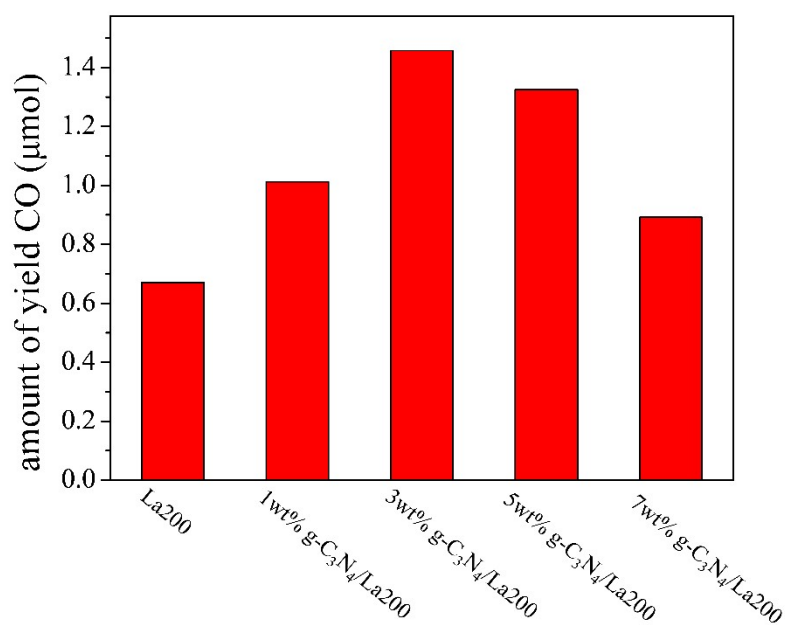

**Figure S4.** Photocatalytic activity of Xwt% g-C<sub>3</sub>N<sub>4</sub>/La<sub>200</sub>.

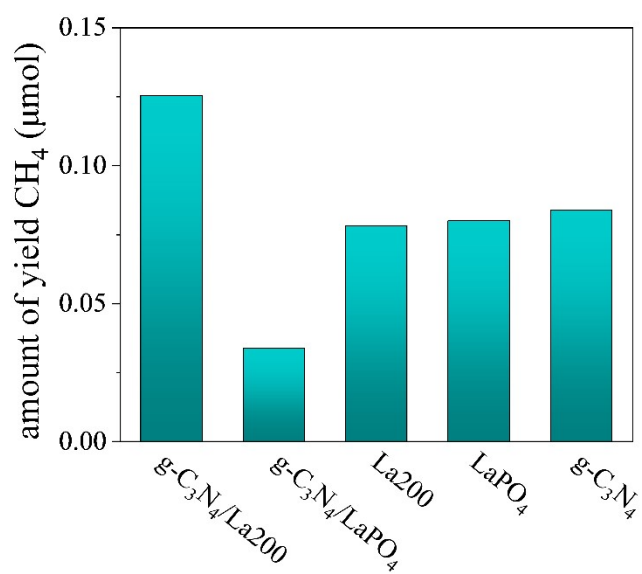

**Figure S5.** Photocatalytic results of photo-reduction of CO<sub>2</sub> into CH<sub>4</sub> for g-C<sub>3</sub>N<sub>4</sub>, LaPO<sub>4</sub>, La200, g-C<sub>3</sub>N<sub>4</sub>/LaPO<sub>4</sub> and g-C<sub>3</sub>N<sub>4</sub>/La200.

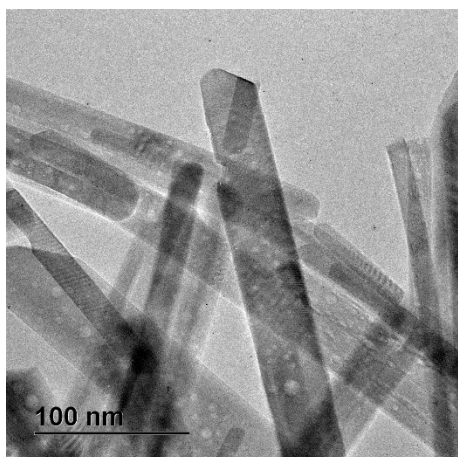

**Figure S6.** TEM image of g-C<sub>3</sub>N<sub>4</sub>/La200 samples after six runs of photocatalytic reaction.

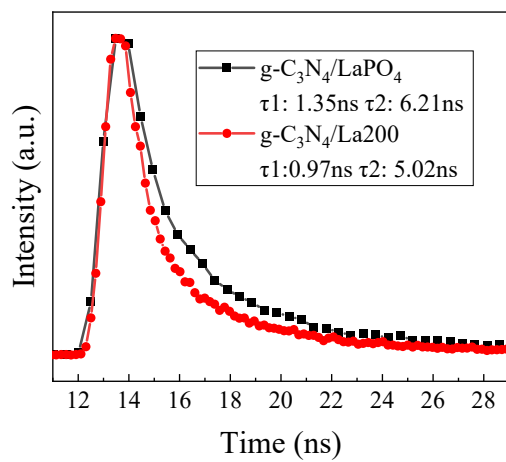

**Figure S7.** Time-resolved PL decay curves for g-C<sub>3</sub>N<sub>4</sub>/LaPO<sub>4</sub> and g-C<sub>3</sub>N<sub>4</sub>/La200 (excited at 300 nm and monitored at 450 nm).
